# Supplementary material
Source: HighWire-hosted journal article supplement (https://erj.ersjournals.com/content/56/2/2000775)
Supplement: inline-supplementary-material-2 [file inline-supplementary-material-2.pdf]

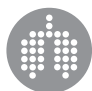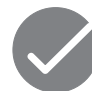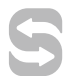

SHAREABLE PDF

# A fully automatic deep learning system for COVID-19 diagnostic and prognostic analysis

Shuo Wang<sup>1,12</sup>, Yunfei Zha<sup>2,12</sup>, Weimin Li<sup>3,12</sup>, Qingxia Wu<sup>4,12</sup>, Xiaohu Li<sup>5,12</sup>, Meng Niu<sup>6,12</sup>, Meiyun Wang<sup>7,12</sup>, Xiaoming Qiu<sup>8,12</sup>, Hongjun Li<sup>9,12</sup>, He Yu<sup>3</sup>, Wei Gong<sup>2</sup>, Yan Bai<sup>7</sup>, Li Li<sup>9</sup>, Yongbei Zhu<sup>1</sup>, Liusu Wang<sup>1</sup> and Jie Tian<sup>1,10,11</sup>

**Affiliations:** <sup>1</sup>Beijing Advanced Innovation Center for Big Data-Based Precision Medicine, School of Medicine and Engineering, Beihang University, Beijing, China. <sup>2</sup>Dept of Radiology, Renmin Hospital of Wuhan University, Wuhan, China. <sup>3</sup>Dept of Respiratory and Critical Care Medicine, West China Hospital, Sichuan University, Chengdu, China. <sup>4</sup>College of Medicine and Biomedical Information Engineering, Northeastern University, Shenyang, China. <sup>5</sup>Dept of Radiology, the First Affiliated Hospital of Anhui Medical University, Hefei, China. <sup>6</sup>Dept of Interventional Radiology, the First Hospital of China Medical University, Shenyang, China. <sup>7</sup>Dept of Medical Imaging, Henan Provincial People's Hospital and the People's Hospital of Zhengzhou University, Zhengzhou, China. <sup>8</sup>Dept of Radiology, Huangshi Central Hospital, Affiliated Hospital of Hubei Polytechnic University, Edong Healthcare Group, Huangshi, China. <sup>9</sup>Dept of Radiology, Beijing Youan Hospital of Capital Medical University, Beijing, China. <sup>10</sup>CAS Key Laboratory of Molecular Imaging, Institute of Automation, Chinese Academy of Sciences, Beijing, China. <sup>11</sup>Engineering Research Center of Molecular and Neuro Imaging of Ministry of Education, School of Life Science and Technology, Xidian University, Xi'an, China. <sup>12</sup>Contributed equally.

**Correspondence:** Jie Tian, CAS Key Laboratory of Molecular Imaging, Institute of Automation, Chinese Academy of Sciences, Beijing 100190, China. E-mail: jie.tian@ia.ac.cn

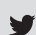

@ERSpublications

A fully automatic deep learning system provides a convenient method for COVID-19 diagnostic and prognostic analysis, which can help COVID-19 screening and finding potential high-risk patients with worse prognosis <https://bit.ly/3bRaxGw>

**Cite this article as:** Wang S, Zha Y, Li W, *et al.* A fully automatic deep learning system for COVID-19 diagnostic and prognostic analysis. *Eur Respir J* 2020; 56: 2000775 [<https://doi.org/10.1183/13993003.00775-2020>].

This single-page version can be shared freely online.

**ABSTRACT** Coronavirus disease 2019 (COVID-19) has spread globally, and medical resources become insufficient in many regions. Fast diagnosis of COVID-19 and finding high-risk patients with worse prognosis for early prevention and medical resource optimisation is important. Here, we proposed a fully automatic deep learning system for COVID-19 diagnostic and prognostic analysis by routinely used computed tomography.

We retrospectively collected 5372 patients with computed tomography images from seven cities or provinces. Firstly, 4106 patients with computed tomography images were used to pre-train the deep learning system, making it learn lung features. Following this, 1266 patients (924 with COVID-19 (471 had follow-up for >5 days) and 342 with other pneumonia) from six cities or provinces were enrolled to train and externally validate the performance of the deep learning system.

In the four external validation sets, the deep learning system achieved good performance in identifying COVID-19 from other pneumonia (AUC 0.87 and 0.88, respectively) and viral pneumonia (AUC 0.86). Moreover, the deep learning system succeeded to stratify patients into high- and low-risk groups whose hospital-stay time had significant difference ( $p=0.013$  and  $p=0.014$ , respectively). Without human

assistance, the deep learning system automatically focused on abnormal areas that showed consistent characteristics with reported radiological findings.

Deep learning provides a convenient tool for fast screening of COVID-19 and identifying potential high-risk patients, which may be helpful for medical resource optimisation and early prevention before patients show severe symptoms.
